# Supplementary material
Source: MDPI journal article supplement (https://www.mdpi.com/2313-0105/9/1/17)
Supplement: s1 [file s1 › batteries-2011037-supplementary.pdf]

# Supplementary Materials

## Elucidating Spatial Distribution of Electrochemical Reaction in a Porous Electrode by Electrochemical Impedance Spectra for Flow Batteries

Jie Zhang, Qilong Gan, Xianzhi Yuan, Zhipeng Xiang, Zhiyong Fu \* and Zhenxing Liang \*

Guangdong Provincial Key Laboratory of Fuel Cell Technology,  
School of Chemistry and Chemical Engineering, South China University of  
Technology, Guangzhou 510641, China

\* Correspondence: zyfu@scut.edu.cn (Z.F.); zliang@scut.edu.cn (Z.L.)

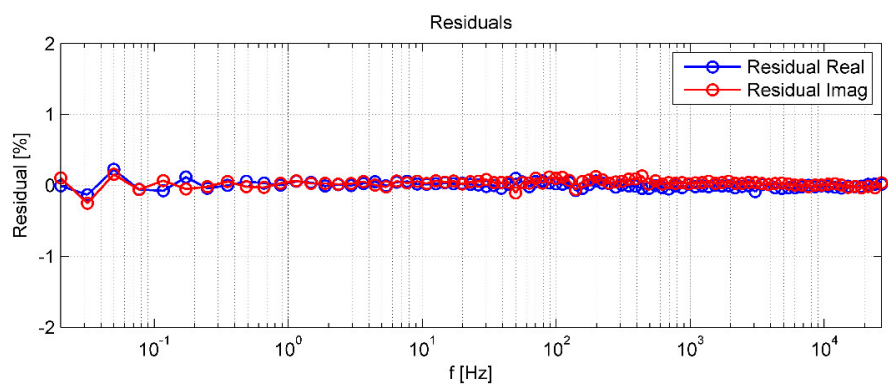

**Figure S1.** Relative residuals of the linear Kramers-Kronig transform.

The cell was assembled using 5 mm-thick electrodes. The electrolyte concentration was 0.050 M  $\text{K}_3[\text{Fe}(\text{CN})_6]$  at 50% SOC. The impedance spectrum was collected using the two-electrode configuration at OCV at a flow rate of  $80 \text{ mL min}^{-1}$ .

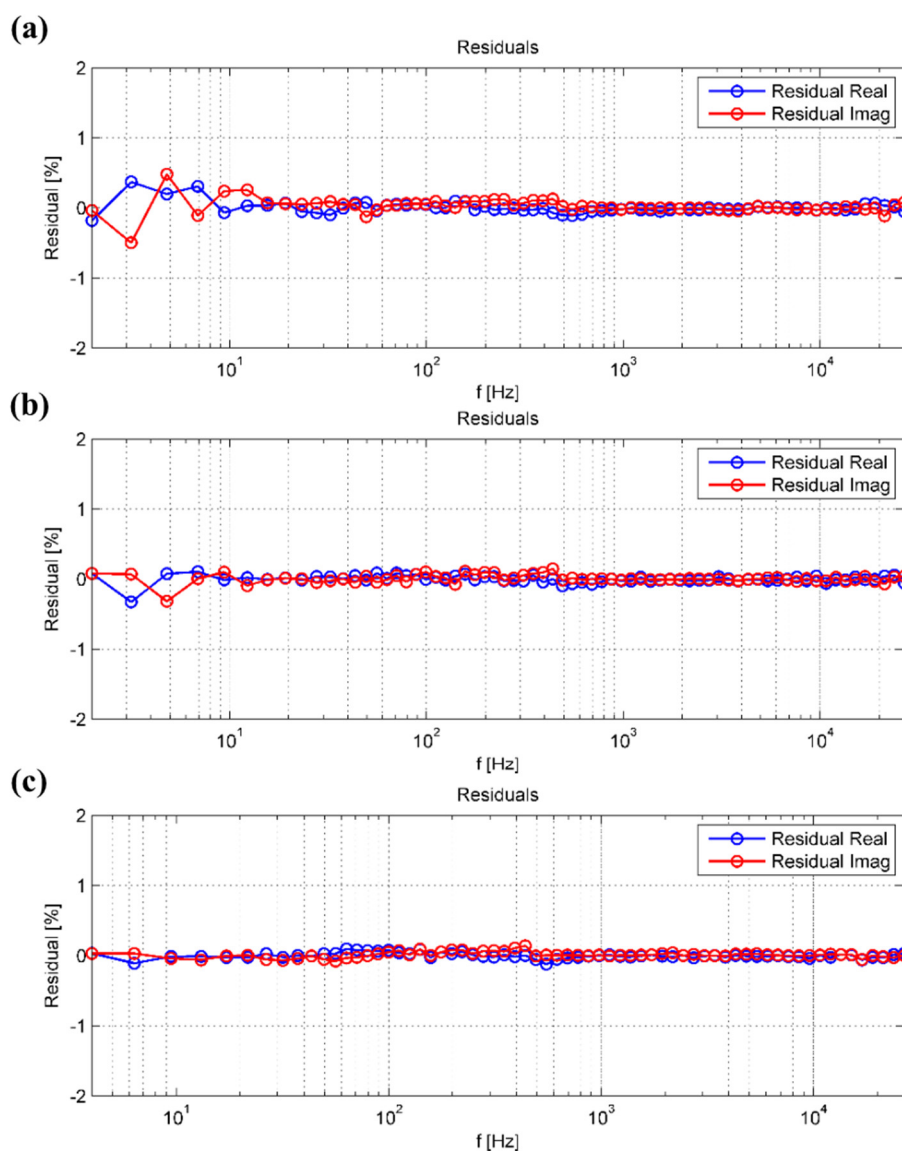

**Figure S2.** Relative residuals of the linear Kramers-Kronig transform. (a) 3 mm-thick electrodes with an anodic polarization of 200 mV; (b) 5 mm-thick electrodes with an anodic polarization of 275 mV; (c) 8 mm-thick electrodes with an anodic polarization of 375 mV. The electrolyte concentration was 0.050 M  $\text{K}_3[\text{Fe}(\text{CN})_6]$  at 50% SOC. The electrolyte flow rate was  $20 \text{ mL min}^{-1}$ . The impedance spectra were collected using the three-electrode configuration.

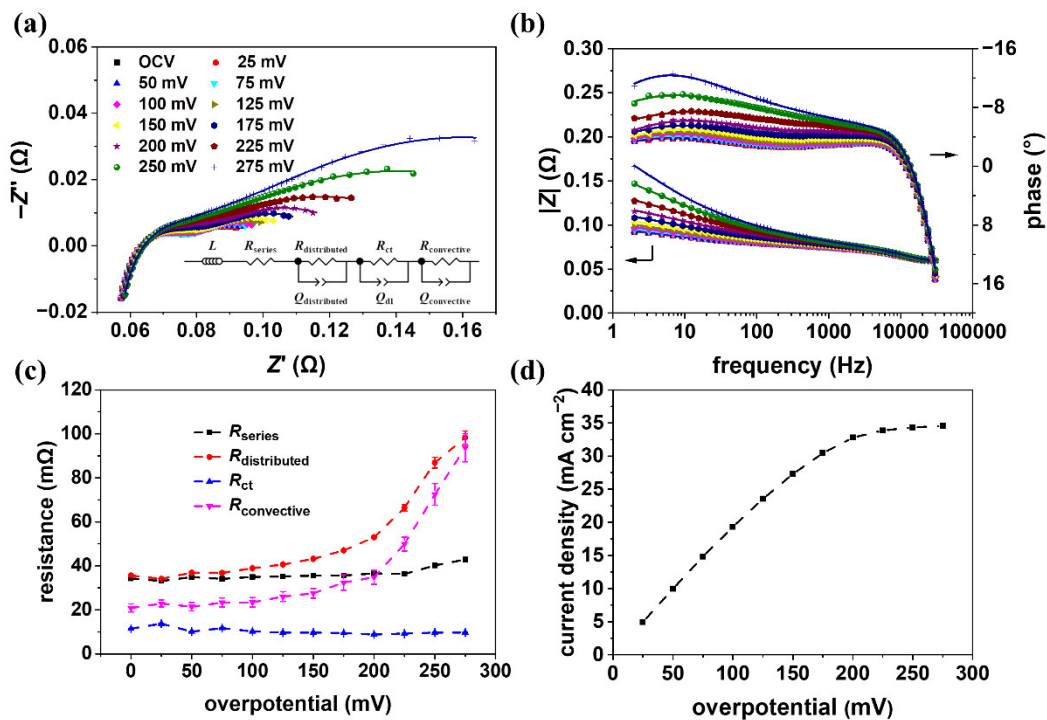

**Figure S3.** Effect of anodic polarization on the electrochemical impedance and the current density. (a) Nyquist plots; (b) Bode plots; (c) resistance value derived from the data fitting; (d) polarization curve. The cell was assembled using 5 mm-thick electrodes. The electrolyte concentration was 0.050 M  $\text{K}_3[\text{Fe}(\text{CN})_6]$  at 50% SOC. The measurements were performed at a flow rate  $20 \text{ mL min}^{-1}$ . The symbols and the solid lines in Nyquist and Bode plots show the experimental and the fitted data, respectively.

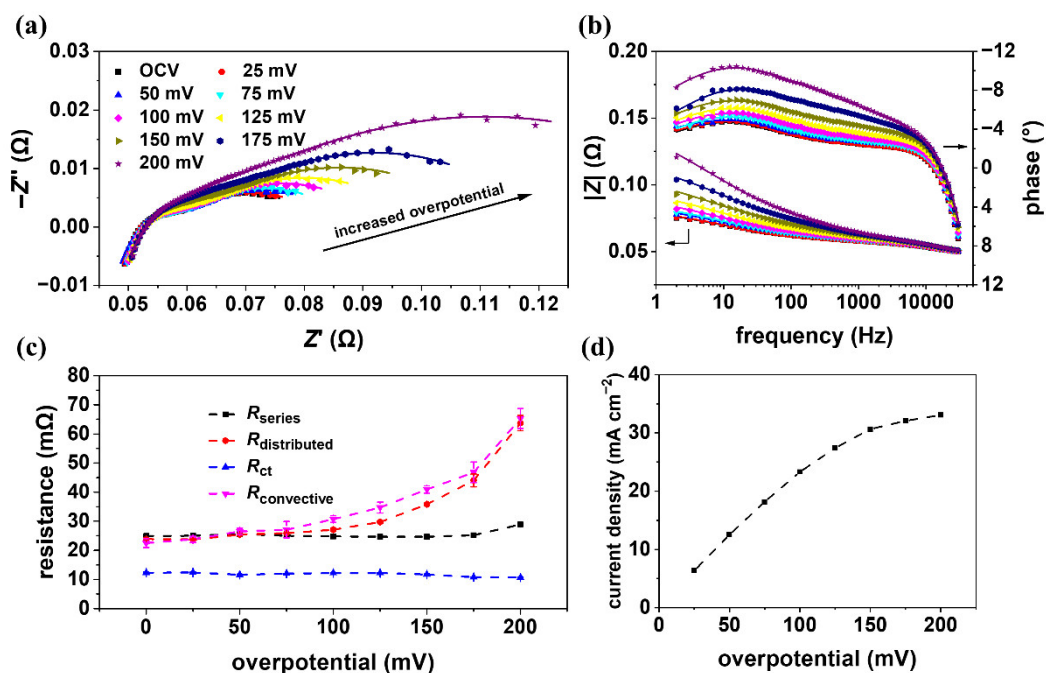

**Figure S4.** Effect of anodic polarization on the electrochemical impedance and the current density. (a) Nyquist plots; (b) Bode plots; (c) resistance value derived from the data fitting; (d) polarization curve. The cell was assembled using 3 mm-thick electrodes. The electrolyte concentration was 0.050 M  $K_3[Fe(CN)_6]$  at 50% SOC. The measurements were performed at a flow rate  $20\ mL\ min^{-1}$ . The symbols and the solid lines in Nyquist and Bode plots show the experimental and the fitted data, respectively.

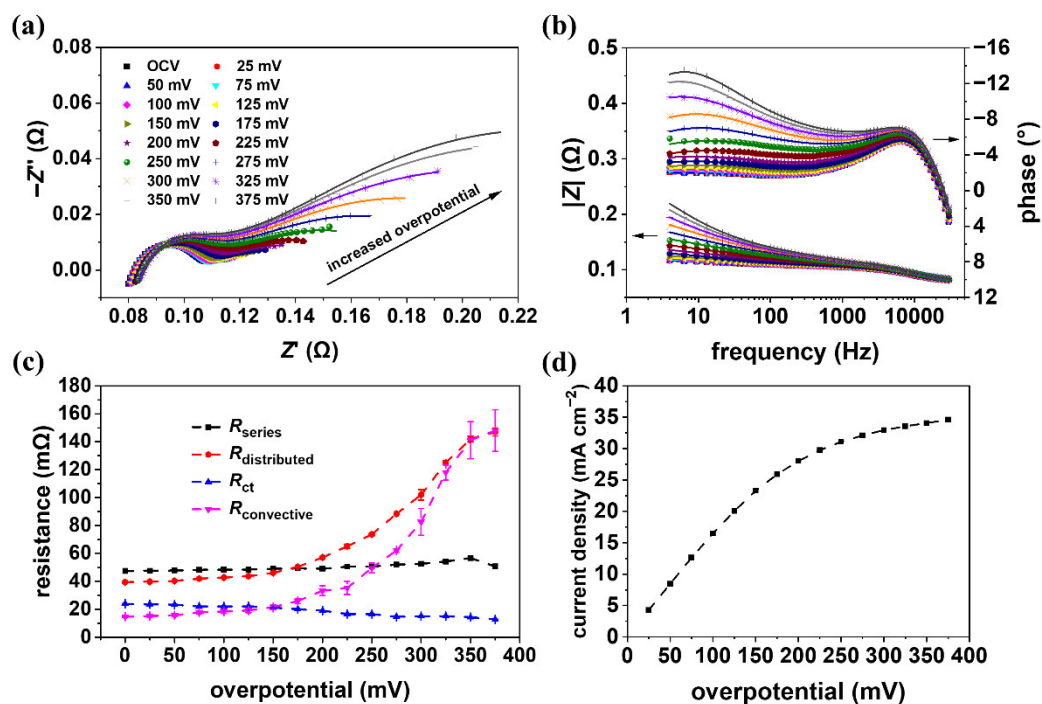

**Figure S5.** Effect of anodic polarization on the electrochemical impedance and the current density. (a) Nyquist plots; (b) Bode plots; (c) resistance value derived from the data fitting; (d) polarization curve. The cell was assembled using 8 mm-thick electrodes. The electrolyte concentration was 0.050 M  $K_3[Fe(CN)_6]$  at 50% SOC. The measurements were performed at a flow rate  $20\ mL\ min^{-1}$ . The symbols and the solid lines in Nyquist and Bode plots show the experimental and the fitted data, respectively.

**Table S1.** Fitting results of flow battery impedance using the two-electrode configuration at 80 mL min<sup>-1</sup> with 0.050 M K<sub>3</sub>[Fe(CN)<sub>6</sub>] at 50% SOC.

| Parameter                                    | Value | Significance | Error |
|----------------------------------------------|-------|--------------|-------|
| $L$ (nH)                                     | 198   | 0.514        | 1.00% |
| $R_{\text{series}}$ (m $\Omega$ )            | 49.0  | 0.677        | 0.46% |
| $R_{\text{distributed}}$ (m $\Omega$ )       | 46.3  | 0.346        | 0.14% |
| $Q_{\text{distributed}}$ (mS·s $^{\alpha}$ ) | 80.2  | 0.179        | 0.37% |
| $\alpha_{\text{distributed}}$                | 0.497 | 0.318        | 1.61% |
| $R_{\text{ct}}$ (m $\Omega$ )                | 27.2  | 0.227        | 0.24% |
| $Q_{\text{dl}}$ (mS·s $^{\alpha}$ )          | 1.59  | 0.139        | 0.15% |
| $\alpha_{\text{dl}}$                         | 0.927 | 0.395        | 0.26% |
| $R_{\text{convection}}$ (m $\Omega$ )        | 11.8  | 0.081        | 2.51% |
| $Q_{\text{convection}}$ (S·s $^{\alpha}$ )   | 2.66  | 0.034        | 1.09% |
| $\alpha_{\text{convection}}$                 | 0.765 | 0.120        | 0.73% |
| $R_{\text{diffusion}}$ (m $\Omega$ )         | 76.6  | 0.197        | 3.74% |
| $Q_{\text{diffusion}}$ (S·s $^{\alpha}$ )    | 39.8  | 0.191        | 1.16% |
| $\alpha_{\text{diffusion}}$                  | 0.904 | 1.70         | 0.13% |
